# Supplementary material for: Rad5 Template Switch Pathway of DNA Damage Tolerance Determines Synergism between Cisplatin and NSC109268 in Saccharomyces cerevisiae
Source: PLOS journal article supplement (doi:10.1371/journal.pone.0077666), 2013-10-10

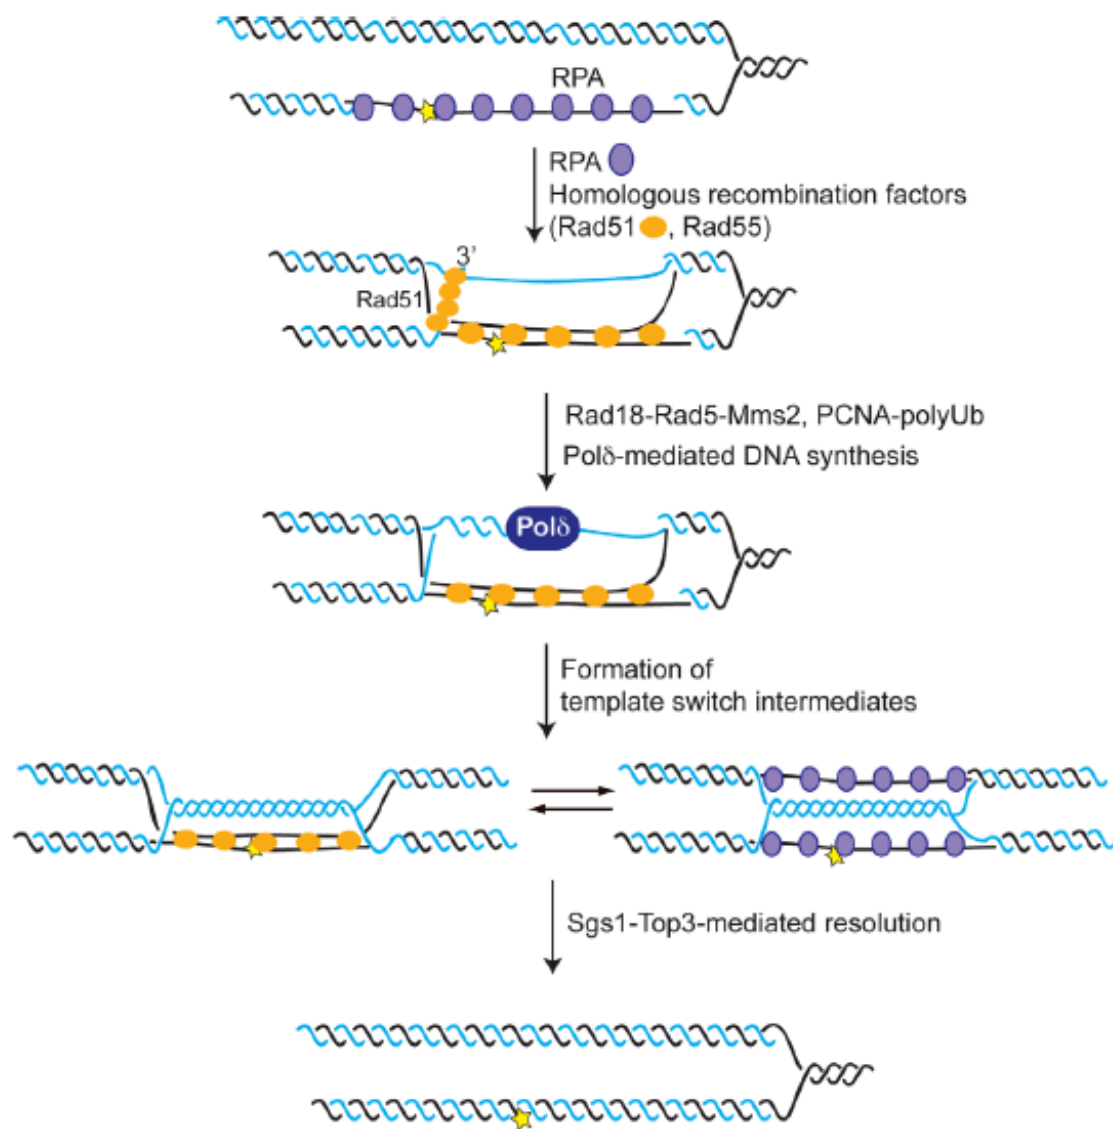

Supplement: S1 (10.1371/journal.pone.0077666.s001) [file journal.pone.0077666.s001]
