# Supplementary material for: Rad5 Template Switch Pathway of DNA Damage Tolerance Determines Synergism between Cisplatin and NSC109268 in Saccharomyces cerevisiae
Source: PLOS journal article supplement (doi:10.1371/journal.pone.0077666), 2013-10-10
Supplement: S3 (10.1371/journal.pone.0077666.s003) [file journal.pone.0077666.s003]

**WT**

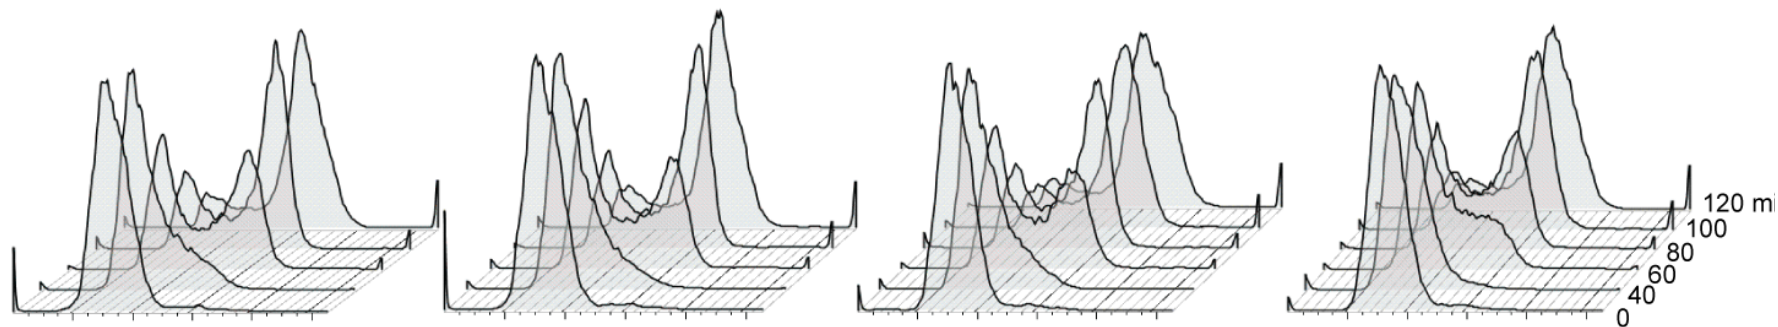

***rad5*Δ**

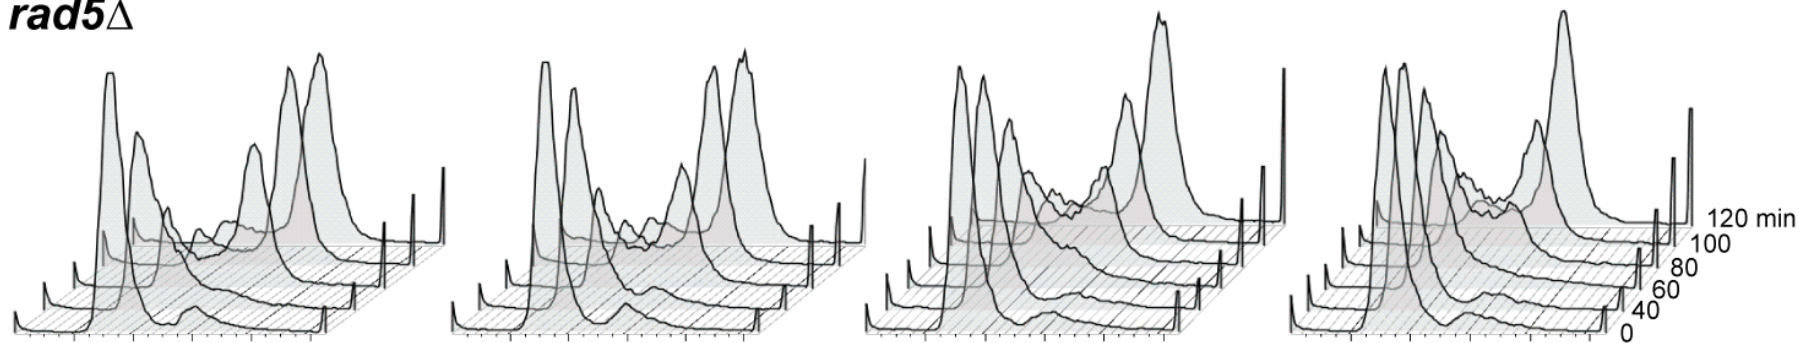

- CP  
- NSC109268

- CP  
+ NSC109268

+ CP  
- NSC109268

+ CP  
+ NSC109268
