# Supplementary material for: Rad5 Template Switch Pathway of DNA Damage Tolerance Determines Synergism between Cisplatin and NSC109268 in Saccharomyces cerevisiae
Source: PLOS journal article supplement (doi:10.1371/journal.pone.0077666), 2013-10-10
Supplement: S5 (10.1371/journal.pone.0077666.s005) [file journal.pone.0077666.s005]

| Gene deletion                   | Function/pathway of inactivated gene product                          | DEF (50% survival) | DEF (10% survival) |
|---------------------------------|-----------------------------------------------------------------------|--------------------|--------------------|
| <b>BY4741 strain background</b> |                                                                       |                    |                    |
| <i>pso2</i>                     | Interstrand cross-link repair                                         | 5.9                | 6.0                |
| <i>pph3</i>                     | Protein phosphatase                                                   | 3.2                | 2.5                |
| <i>ctr1</i>                     | Copper transporter                                                    | 2.9                | 3.0                |
| <i>rad30</i>                    | Translesion synthesis                                                 | 2.8                | 2.6                |
| <i>ump1</i>                     | Chaperone required for 20S proteasome maturation                      | 2.8                | 2.4                |
| <i>ptc3</i>                     | Protein phosphatase                                                   | 2.7                | 3.0                |
| <i>ccc2</i>                     | Copper transporter                                                    | 2.6                | 2.0                |
| <i>sml1</i>                     | Ribonucleotide reductase inhibitor                                    | 2.5                | 2.0                |
| <i>sml1 rad53</i>               | Checkpoint kinase ( <i>sml1</i> deletion required for viability)      | 2.5                | 1.5                |
| WT                              | Wild type                                                             | 2.5                | 1.80               |
| <i>rad59</i>                    | Homologous recombination, single-strand annealing                     | 2.1                | 1.9                |
| <i>rad50</i>                    | MRN/X- repair complex                                                 | 1.9                | 1.7                |
| <i>rad24</i>                    | Checkpoint protein, DNA damage detection                              | 1.9                | 1.4                |
| <i>ptc2</i>                     | Protein phosphatase                                                   | 1.8                | 1.9                |
| <i>rev3</i>                     | Translesion synthesis                                                 | 1.8                | 1.9                |
| <i>rad10</i>                    | Nucleotide excision repair                                            | 1.7                | 1.5                |
| <i>rtt101</i>                   | Ubiquitin-ligase component, promoting replication through damaged DNA | 1.6                | 3.3                |
| <i>psy3</i>                     | Shu complex component, promoting homologous recombination             | 1.2                | 1.1                |
| <i>sgs1</i>                     | RecQ-like DNA helicase                                                | 1.2                | 1.1                |
| <i>rad18</i>                    | DNA damage tolerance by template switch(TS) and translesion synthesis | 1.2                | 1.0                |
| <i>rad51</i>                    | Homologous recombination                                              | 1.1                | 1.2                |
| <i>ubc13</i>                    | DNA damage tolerance (TS)                                             | 1.1                | 1.0                |
| <i>mms2</i>                     | DNA damage tolerance (TS)                                             | 1.1                | 1.0                |
| <i>rad5</i>                     | DNA damage tolerance (TS)                                             | 0.9                | 1.0                |
| <b>YJK17 strain background</b>  |                                                                       |                    |                    |
| <i>pph3</i>                     | Protein phosphatase                                                   | 5.2                | 4.0                |
| WT                              | Wild type                                                             | 4.2                | 3.0                |

|                           |                      |     |     |
|---------------------------|----------------------|-----|-----|
| <i>ptc2 ptc3</i>          | Protein phosphatases | 4.1 | 3.8 |
| <i>ptc2 ptc3<br/>pph3</i> | Protein phosphatases | 1.9 | 1.6 |
